# Supplementary material
Source: PubMed Central journal article supplement (PMC3074470)

## Online Tables

**Table I. Characteristics of the patient population.**

**Table II. List of antibodies.**

**Table III. Magnitude of sampling.**

## Legends to Online Figures

**Figure I. CSC preparation.** **A**, Number and weight of cardiac biopsies. **B**, Time required for the initial expansion of small cardiac cells. **C**, Time required for the expansion of c-kit-positive mCSCs. **D**, Time required for the expansion of c-kit-positive KDR-positive vCSCs. Individual and average values are shown.

## Methods

### **Myogenic (mCSCs) and Vasculogenic (vCSCs) Cardiac Stem Cells**

Endomyocardial biopsies were obtained ex vivo from the right side of the interventricular septum of explanted hearts or from the apex of the left ventricle following LVAD implantation. Biopsies were collected with a standard clinical biptome (7F Maxi-Curved, Argon) and were directed against the mid-right ventricular septum to mimic as much as possible the location of biopsies performed from a right internal jugular approach. The choice was made to obtain these specimens ex-vivo so as to 1) not interfere with the flow of clinical care involved in patients undergoing transplant often during off hours and 2) not put patients through additional procedures carrying additive risks such as arrhythmia and perforation. Two-five biopsies were harvested from each heart, pooled together, and subjected to enzymatic digestion in a solution containing collagenase.<sup>1,2</sup> Unfractionated small cardiac cells were grown and subsequently selected for c-kit with immunomagnetic beads (Miltenyi). C-kit-positive cells were then expanded in F12K medium supplemented with 10% fetal bovine serum to reach  $5 \times 10^6$  cells. Cells were analyzed by FACS to evaluate their surface phenotype. C-kit-positive cells were also sorted for KDR with immunomagnetic beads to obtain vCSCs.

### **FACS Analysis**

mCSCs and vCSCs were fixed in 4% paraformaldehyde for 15 minutes at room temperature and incubated with antibodies against epitopes of bone marrow hematopoietic and mesenchymal cells (Online Table II).<sup>1-5</sup> The fraction of c-kit-positive cells expressing KDR was also measured. In all cases, CSCs were incubated with the primary antibody for 45 minutes at 37°C. Flow cytometry was performed with FACSaria (Becton Dickinson), or Accuri C6 (Accuri Cytometers) instruments. Cellular debris and aggregates were gated out based on forward and side scatter. Gating on the signal of the nuclear stain DAPI was used to exclude additional artifacts. Isotype-matched negative controls were utilized to define the threshold for each specific signal and establish the appropriate gate. Data were analyzed with the instrument software.

### **Population Doubling Time (PDT), BrdU Labeling, Senescence and Apoptosis**

mCSCs and vCSCs were plated at low density, 100 cells per  $\text{cm}^2$ . The number of cells per unit area was determined daily for 5-7 days.<sup>1,2</sup> PDT was computed by linear regression of  $\log_2$  values of cell number. Only values in the exponential growth phase were used. To determine the fraction of cycling cells, BrdU (1  $\mu\text{g/ml}$ ) was added to the

medium for 12 hours. Cells were fixed in 4% paraformaldehyde and BrdU incorporation was determined by staining with a mouse monoclonal antibody (Roche) and confocal microscopy. BrdU positive and negative cells were considered cycling and non-cycling mCSCs or vCSCs, respectively. The fraction of cells that reached replicative senescence and irreversible growth arrest was evaluated by the expression of the senescence-associated protein p16<sup>INK4a</sup>. Apoptosis was measured by TdT labeling (ApoAlert DNA Fragmentation Assay, Clontech).<sup>1-3,5,6-8</sup>

### **Telomere Length**

Quantitative measurements of telomere length were determined by flow-FISH. Calibration of the flow cytometer, cell fixation, staining protocol and normalization were performed utilizing mouse lymphoma cells with known telomere length. Approximately  $5 \times 10^5$  mCSCs or vCSCs and mouse lymphoma cells with long telomeres (L5178Y-R) were washed in hybridization buffer and re-suspended in hybridization solution containing formamide and 0.3  $\mu\text{g/ml}$  FITC-conjugated PNA probe. Control samples were incubated in hybridization solution in the absence of PNA probe. Lymphoma cells were distinguished from hCSCs by immunolabeling with CD45 antibody. DNA content was established by propidium iodide staining. Cells were gated at G0/G1 based on DNA content and fluorescence intensity of telomeres was calculated.<sup>9,10</sup> All measurements were performed on the FACSCanto instrument (Becton Dickinson).

### **Telomerase Activity**

The catalytic activity of telomerase was assessed by quantitative PCR.<sup>11,12</sup> Cells were homogenized in CHAPS buffer and centrifuged at 4°C. Two different protein concentrations, 0.5 and 1  $\mu\text{g}$ , were employed for the assay. mCSC and vCSC extracts were incubated in a solution containing reverse transcriptase reaction mix and Taq polymerase (TRAPEZE RT Telomerase Detection Kit, Chemicon) at 30°C for 30 minutes. HeLa cells were used as positive control and serial dilutions of control template TSR8 were employed for quantitation. CHAPS buffer in the absence of protein lysates was used as negative control. PCR cycling conditions were as follows: 1 cycle of 95°C for 2.0 minutes; 40 cycles of 94°C for 15 seconds and 59°C for 60 seconds. Data were collected at the 59°C stage of each cycle.

### **Differentiation of mCSCs and vCSCs**

mCSCs and vCSCs were exposed to dexamethasone,  $10^{-8}$  M, for 5 days to induce commitment. Cells were fixed in 4% paraformaldehyde and the expression of proteins specific for myocytes, ECs and SMCs was determined by FACS analysis (see above). Cells were analyzed by FACSAria (Becton Dickinson).

### **Statistical Analysis**

Results are presented as mean  $\pm$  SD. Statistical significance with respect to previous results<sup>1</sup> was determined by Student's *t* test.<sup>13</sup> All *P* values are two-sided and values less than 0.05 were considered to be significant. For sampling, see Online Table III.

### **References**

1. Bearzi C, Rota M, Hosoda T, Tillmanns J, Nascimbene A, De Angelis A, Yasuzawa-Amano S, Trofimova I, Siggins RW, Lecapitaine N, Cascapera S, Beltrami AP, D'Alessandro DA, Zias E, Quaini F, Urbanek K, Michler RE, Bolli R, Kajstura J, Leri A, Anversa P. Human cardiac stem cells. *Proc Natl Acad Sci USA*. 2007; 104:14068-14073.

2. Bearzi C, Leri A, Lo Monaco F, Rota M, Gonzalez A, Hosoda T, Pepe M, Qanud K, Ojaimi C, Bardelli S, D'Amario D, D'Alessandro DA, Michler RE, Dimmeler S, Zeiher AM, Urbanek K, Hintze TH, Kajstura J, Anversa P. Identification of a coronary vascular progenitor cell in the human heart. *Proc Natl Acad Sci USA*. 2009;106:15885-15890.
3. Gonzalez A, Rota M, Nurzynska D, Misao Y, Tillmanns J, Ojaimi C, Padin-Iruegas ME, Müller P, Esposito G, Bearzi C, Vitale S, Dawn B, Sanganalmath SK, Baker M, Hintze TH, Bolli R, Urbanek K, Hosoda T, Anversa P, Kajstura J, Leri A. Activation of cardiac progenitor cells reverses the failing heart senescent phenotype and prolongs lifespan. *Circ Res*. 2008; 102:597-606.
4. Hosoda T, D'Amario D, Cabral-Da-Silva MC, Zheng H, Padin-Iruegas ME, Ogorek B, Ferreira-Martins J, Yasuzawa-Amano S, Amano K, Ide-Iwata N, Cheng W, Rota M, Urbanek K, Kajstura J, Anversa P, Leri A. Clonality of mouse and human cardiomyogenesis in vivo. *Proc Natl Acad Sci USA*. 2009; 106:17169-17174.
5. Urbanek K, Cabral-da-Silva MC, Ide-Iwata N, Maestroni S, Delucchi F, Zheng H, Ferreira-Martins J, Ogórek B, D'Amario D, Bauer M, Zerbini G, Rota M, Hosoda T, Liao R, Anversa P, Kajstura J, Leri A. Inhibition of notch1-dependent cardiomyogenesis leads to a dilated myopathy in the neonatal heart. *Circ Res*. 2010; 107:429-441.
6. Urbanek K, Rota M, Cascapera S, Bearzi C, Nascimbene A, De Angelis A, Hosoda T, Chimenti S, Baker M, Limana F, Nurzynska D, Torella D, Rotatori F, Rastaldo R, Musso E, Quaini F, Leri A, Kajstura J, Anversa P. Cardiac stem cells possess growth factor-receptor systems that after activation regenerate the infarcted myocardium, improving ventricular function and long-term survival. *Circ Res*. 2005; 97:663-673.
7. Rota M, Padin-Iruegas ME, Misao Y, De Angelis A, Maestroni S, Ferreira-Martins J, Fiumana E, Rastaldo R, Arcarese ML, Mitchell TS, Boni A, Bolli R, Urbanek K, Hosoda T, Anversa P, Leri A, Kajstura J. Local activation or implantation of cardiac progenitor cells rescues scarred infarcted myocardium improving cardiac function. *Circ Res*. 2008; 103:107-116.
8. Padin-Iruegas ME, Misao Y, Davis ME, Segers VF, Esposito G, Tokunou T, Urbanek K, Hosoda T, Rota M, Anversa P, Leri A, Lee RT, Kajstura J. Cardiac progenitor cells and biotinylated insulin-like growth factor-1 nanofibers improve endogenous and exogenous myocardial regeneration after infarction. *Circulation*. 2009; 120:876-887.
9. Baerlocher GM, Vulto I, de Jong G, Lansdorp PM. Flow cytometry and FISH to measure the average length of telomeres (flow FISH). *Nat Protoc*. 2006; 1:2365-2376.
10. Halaschek-Wiener J, Vulto I, Fornika D, Collins J, Connors JM, Le ND, Lansdorp PM, Brooks-Wilson A. Reduced telomere length variation in healthy oldest old. *Mech Ageing Dev*. 2008; 129:638-641.
11. Ezashi T, Telugu BP, Alexenko AP, Sachdev S, Sinha S, Roberts RM. Derivation of induced pluripotent stem cells from pig somatic cells. *Proc Natl Acad Sci USA*. 2009;106:10993-10998.

12. Burrows AE, Smogorzewska A, Elledge SJ. Polybromo-associated BRG1-associated factor components BRD7 and BAF180 are critical regulators of p53 required for induction of replicative senescence. *Proc Natl Acad Sci USA*. 2010;107:14280-14285.

13. Berenson ML, Levine DM, Rindskopf D, eds. *Applied statistics*. Upper Saddle River, NJ: Prentice Hall; 1988, pp 418.

**Online Table I. Characteristics of the Patients**

| Age | Gender | EF (%) | Duration (y) | Etiology       | Diabetes | Smoking | Hypertension | Hyperlipidemia |
|-----|--------|--------|--------------|----------------|----------|---------|--------------|----------------|
| 30  | M      | 20     | 4            | Non-ischemic*  | yes      | no      | no           | no             |
| 54  | M      | 15     | 29           | Non-ischemic** | no       | yes     | yes          | yes            |
| 51  | M      | 15     | 5            | Ischemic**     | no       | yes     | yes          | no             |
| 67  | M      | 15     | 21           | Ischemic**     | no       | no      | yes          | yes            |
| 44  | M      | 15     | 12           | Non-ischemic** | no       | no      | no           | no             |
| 55  | M      | 35     | 17           | Ischemic*      | yes      | yes     | no           | yes            |
| 23  | F      | 20     | 2            | Peripartum**   | no       | no      | no           | no             |
| 49  | M      | 20     | 7            | Non-ischemic** | no       | yes     | yes          | yes            |
| 57  | M      | 25     | 12           | Ischemic*      | no       | yes     | no           | yes            |
| 50  | M      | 20     | 24           | Non-ischemic** | no       | yes     | yes          | yes            |
| 67  | M      | 65     | 14           | Restrictive**  | no       | yes     | no           | yes            |
| 63  | M      | 15     | 27           | Non-ischemic** | no       | yes     | no           | no             |
| 51  | M      | 20     | 12           | Non-ischemic** | no       | yes     | yes          | yes            |
| 61  | M      | 35     | 6            | Ischemic*      | yes      | yes     | yes          | yes            |
| 53  | F      | 20     | 6            | Non-ischemic*  | no       | no      | yes          | yes            |
| 50  | M      | 15     | 3            | Non-ischemic*  | no       | no      | yes          | no             |
| 58  | M      | 20     | 13           | Sarcoidosis**  | no       | yes     | no           | yes            |
| 37  | F      | 25     | 8            | Non-ischemic** | no       | no      | no           | no             |
| 54  | M      | 15     | 11           | Non-ischemic*  | no       | yes     | yes          | yes            |
| 55  | M      | 20     | 14           | Ischemic**     | no       | yes     | yes          | yes            |

EF: ejection fraction; \*Indicates LVAD; \*\*Indicate Explanted hearts.

**Online Table II. List of Antibodies**

| <b>Epitope</b>                | <b>Manufacturer</b> | <b>Host Animal</b> | <b>Labeling</b>        |
|-------------------------------|---------------------|--------------------|------------------------|
| <b>Surface Markers</b>        |                     |                    |                        |
| c-kit                         | DAKO                | rabbit             | direct, indirect, F, T |
| KDR                           | R&D Systems         | mouse              | indirect, T, Cy5       |
| CD34                          | BD Pharmigen        | mouse              | direct, PE             |
| CD45                          | BD Pharmigen        | mouse              | direct, APC            |
| CD133                         | BD Pharmigen        | mouse              | direct, PE             |
| Lineage Markers               | BD Pharmigen        | mouse              | indirect, Cy5          |
| CD90                          | BD Pharmigen        | mouse              | direct, PE             |
| CD105                         | BD Pharmigen        | mouse              | direct, PE             |
| CD31                          | Chemicon            | rabbit             | indirect, F, T         |
| <b>Transcription Factors</b>  |                     |                    |                        |
| GATA4                         | Santa Cruz          | rabbit             | direct, indirect, F, T |
| Nkx2.5                        | Santa Cruz          | goat               | direct, indirect, F, T |
| MEF2C                         | Santa Cruz          | goat               | indirect, F, T         |
| GATA6                         | Santa Cruz          | rabbit             | indirect, F, T         |
| <b>Cytoplasmic Proteins</b>   |                     |                    |                        |
| $\alpha$ -sarcomeric actin    | Sigma               | mouse              | indirect, F, T         |
| von Willebrand factor         | DAKO                | rabbit             | indirect, F, T, Cy5    |
| $\alpha$ -smooth muscle actin | Sigma               | mouse              | indirect, F, T, Cy5    |
| <b>Other Epitopes</b>         |                     |                    |                        |
| p16 <sup>ink4a</sup>          | Santa Cruz          | mouse              | direct, indirect, F, T |
| BrdU                          | Roche               | mouse              | indirect, F, Cy5       |

F: fluorescein isothiocyanate; T: tetramethyl rhodamine isothiocyanate; Cy5: cyanine 5.

**Online Table III. Magnitude of Sampling**

| Parameter                 | N value | Aggregate sample size  | Sample size (mean ± SD) |
|---------------------------|---------|------------------------|-------------------------|
| <b>FACS Analysis</b>      |         |                        |                         |
| c-kit                     | 20      | 275,336 <sup>(1)</sup> | 13,766 ± 5,795          |
| KDR                       | 20      | 138,234 <sup>(1)</sup> | 6,911 ± 3,225           |
| CD34                      | 10      | 58,510 <sup>(1)</sup>  | 5,851 ± 3,424           |
| CD45                      | 10      | 56,686 <sup>(1)</sup>  | 5,668 ± 1,761           |
| CD133                     | 10      | 44,030 <sup>(1)</sup>  | 4,403 ± 1,641           |
| Lineage markers           | 10      | 61,068 <sup>(1)</sup>  | 6,108 ± 2,393           |
| CD90                      | 10      | 54,563 <sup>(1)</sup>  | 5,456 ± 2,510           |
| CD105                     | 10      | 55,693 <sup>(1)</sup>  | 5,563 ± 1,665           |
| <b>Growth and Death</b>   |         |                        |                         |
| <b>mCSCs</b>              |         |                        |                         |
| PDT                       | 20      | 29,875 <sup>(2)</sup>  | 1,012 ± 39              |
| BrdU                      | 20      | 29,032 <sup>(2)</sup>  | 1,452 ± 349             |
| TdT                       | 20      | 27,598 <sup>(2)</sup>  | 1,380 ± 229             |
| Telomere Length           | 20      | 123,088 <sup>(1)</sup> | 6,154 ± 1307            |
| Telomerase Activity       | 20      | N/A                    | N/A                     |
| p16 <sup>INK4a</sup>      | 20      | 25,896 <sup>(2)</sup>  | 1,295 ± 253             |
| <b>vCSCs</b>              |         |                        |                         |
| PDT                       | 20      | 28,175 <sup>(2)</sup>  | 931 ± 89                |
| BrdU                      | 20      | 20,939 <sup>(2)</sup>  | 1,047 ± 163             |
| TdT                       | 20      | 20,785 <sup>(2)</sup>  | 1,039 ± 181             |
| Telomere Length           | 20      | 93,805 <sup>(1)</sup>  | 4,690 ± 1346            |
| Telomerase Activity       | 20      | N/A                    | N/A                     |
| p16 <sup>INK4a</sup>      | 20      | 20,762 <sup>(2)</sup>  | 1,038 ± 285             |
| <b>Lineage Commitment</b> |         |                        |                         |
| <b>mCSCs</b>              |         |                        |                         |
| Baseline                  |         |                        |                         |
| GATA4                     | 8       | 56,972 <sup>(1)</sup>  | 7,121 ± 2,775           |
| Nkx2.5                    | 8       | 68,753 <sup>(1)</sup>  | 8,594 ± 2,104           |
| MEF2C                     | 8       | 79,668 <sup>(1)</sup>  | 9,958 ± 4,122           |
| α-SA                      | 8       | 59,177 <sup>(1)</sup>  | 7,397 ± 3,539           |
| GATA6                     | 8       | 67,577 <sup>(1)</sup>  | 8,447 ± 4,248           |
| α-SMA                     | 8       | 67,014 <sup>(1)</sup>  | 8,376 ± 3,841           |
| CD31                      | 8       | 46,439 <sup>(1)</sup>  | 5,804 ± 2,734           |
| vWf                       | 8       | 72,858 <sup>(1)</sup>  | 9,107 ± 4,458           |
| Differentiated            |         |                        |                         |
| GATA4                     | 8       | 81,303 <sup>(1)</sup>  | 10,162 ± 4,576          |
| Nkx2.5                    | 8       | 72,878 <sup>(1)</sup>  | 9,109 ± 4,632           |
| MEF2C                     | 8       | 69,679 <sup>(1)</sup>  | 8,747 ± 1,696           |
| α-SA                      | 8       | 82,497 <sup>(1)</sup>  | 10,312 ± 4,217          |

|                |   |                        |                |
|----------------|---|------------------------|----------------|
| GATA6          | 8 | 92,320 <sup>(1)</sup>  | 11,577 ± 3,122 |
| α-SMA          | 8 | 63,539 <sup>(1)</sup>  | 7,942 ± 2,728  |
| CD31           | 8 | 70,110 <sup>(1)</sup>  | 8,763 ± 3,199  |
| vWf            | 8 | 82,629 <sup>(1)</sup>  | 10,328 ± 2,959 |
| <b>vCSCs</b>   |   |                        |                |
| Baseline       |   |                        |                |
| GATA4          | 8 | 74,705 <sup>(1)</sup>  | 9,338 ± 4,348  |
| Nkx2.5         | 8 | 71,548 <sup>(1)</sup>  | 8,943 ± 3,287  |
| MEF2C          | 8 | 77,449 <sup>(1)</sup>  | 9,681 ± 4,285  |
| α-SA           | 8 | 56,505 <sup>(1)</sup>  | 8,072 ± 3,631  |
| GATA6          | 8 | 70,779 <sup>(1)</sup>  | 8,847 ± 3,036  |
| α-SMA          | 8 | 59,942 <sup>(1)</sup>  | 7,492 ± 1,501  |
| CD31           | 8 | 55,592 <sup>(1)</sup>  | 6,949 ± 1,721  |
| vWf            | 8 | 76,075 <sup>(1)</sup>  | 9,509 ± 3,004  |
| Differentiated |   |                        |                |
| GATA4          | 8 | 69,312 <sup>(1)</sup>  | 8,664 ± 2,735  |
| Nkx2.5         | 8 | 67,280 <sup>(1)</sup>  | 8,410 ± 2,524  |
| MEF2C          | 8 | 67,204 <sup>(1)</sup>  | 8,400 ± 2,852  |
| α-SA           | 8 | 73,213 <sup>(1)</sup>  | 9,151 ± 3,025  |
| GATA6          | 8 | 77,198 <sup>(1)</sup>  | 9,649 ± 2,261  |
| α-SMA          | 8 | 100,970 <sup>(1)</sup> | 12,321 ± 5,861 |
| CD31           | 8 | 61,147 <sup>(1)</sup>  | 7,643 ± 2,369  |
| vWf            | 8 | 72,506 <sup>(1)</sup>  | 9,063 ± 2,453  |

<sup>(1)</sup> Number of cells analyzed by FACS; <sup>(2)</sup> Number of cells examined by confocal microscopy.



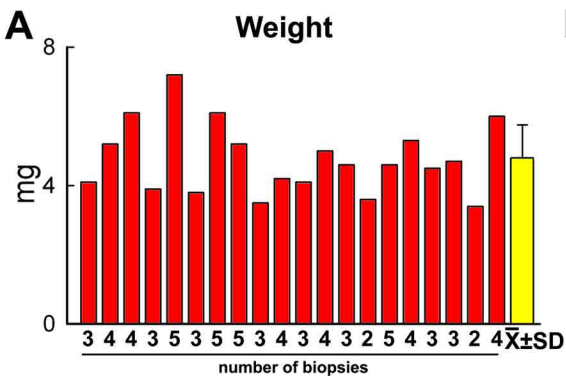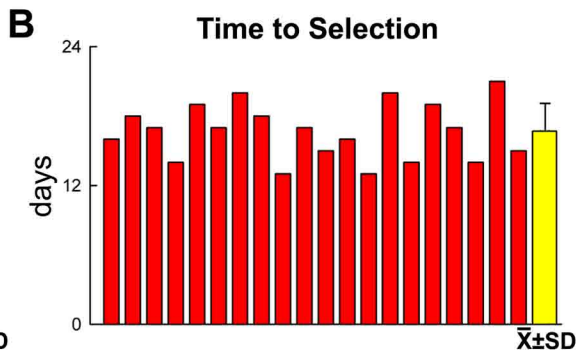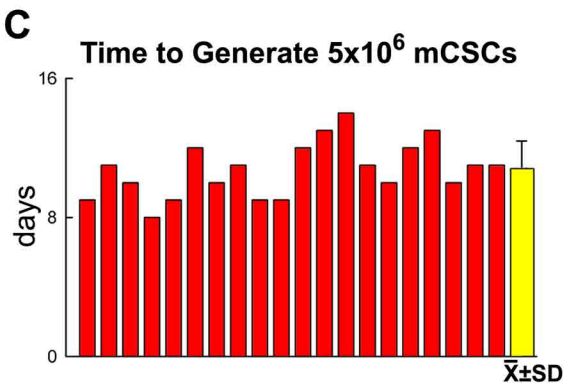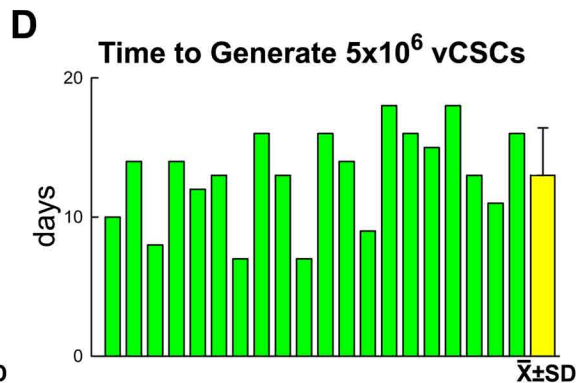

Supplement: NIHMS279959-supplement-1.pdf [file NIHMS279959-supplement-1.pdf]
